# Supplementary material for: Metallothionein 3-Zinc Axis Suppresses Caspase-11 Inflammasome Activation and Impairs Antibacterial Immunity
Source: PubMed Central journal article supplement (PMC8633875; doi:10.3389/fimmu.2021.755961), 2021-11-12
Supplement: DataSheet_1.pdf [file DataSheet_1.pdf]

## SUPPLEMENTAL MATERIALS

### TABLE S1 |

#### Protein-Protein Interaction Network of *Mus musculus* MT3

| Sl. No | Term ID    | Term Description                                           | FDR      | Protein Labels                                                                                                                                                    |
|--------|------------|------------------------------------------------------------|----------|-------------------------------------------------------------------------------------------------------------------------------------------------------------------|
| 1      | GO:0060548 | Negative regulation of cell death                          | 1.12E-12 | Akt1, Ppp5c, Hspb1, Sod2, Hspa8, Gsk3b, Sod1, Hsp90ab1, Hspd1, Cat, Txn1, Dnaja1, Bag1, Cdk5, Bag3, Mt3, Mt1, Ptges3, Bag5, Ar, Pgr, Hsf1, Ahr, Hspa1b            |
| 2      | GO:0043067 | Regulation of programmed cell death                        | 3.01E-11 | Akt1, Hspb1, Sod2, Hspa8, Gsk3b, Sod1, Hsp90ab1, Hspd1, Cat, Ppid, Dnaja1, Bag1, Vcp, Scp2, Cdk5, Bag3, Mt3, Mt1, Tspo, Bag5, Ar, Pgr, Hsf1, Nr3c1, Hdac6, Hspa1b |
| 3      | GO:0042981 | Regulation of apoptotic process                            | 1.69E-10 | Akt1, Hspb1, Sod2, Hspa8, Gsk3b, Sod1, Hsp90ab1, Hspd1, Cat, Ppid, Dnaja1, Bag1, Vcp, Scp2, Cdk5, Bag3, Mt3, Mt1, Tspo, Bag5, Ar, Pgr, Hsf1, Nr3c1, Hspa1b        |
| 4      | GO:0043066 | Negative regulation of apoptotic process                   | 2.34E-09 | Akt1, Hspb1, Sod2, Hspa8, Gsk3b, Sod1, Hsp90ab1, Hspd1, Cat, Dnaja1, Bag1, Bag3, Mt3, Mt1, Bag5, Ar, Pgr, Hsf1, Hspa1b                                            |
| 5      | GO:0043068 | Positive regulation of programmed cell death               | 3.25E-08 | Akt1, Sod2, Gsk3b, Sod1, Hspd1, Ppid, Dnaja1, Bag1, Vcp, Scp2, Cdk5, Tspo, Hsf1, Nr3c1, Hdac6                                                                     |
| 6      | GO:2001242 | Regulation of intrinsic apoptotic signaling pathway        | 0.0011   | Hspb1, Sod2, Sod1, Dnaja1, Bag5                                                                                                                                   |
| 7      | GO:0032680 | Regulation of tumor necrosis factor production             | 0.0048   | Hspb1, Hspd1, Tspo, Hsf1                                                                                                                                          |
| 8      | GO:0060334 | Regulation of interferon-gamma-mediated signaling pathway  | 0.0059   | Cdc37, Hsp90ab1                                                                                                                                                   |
| 9      | GO:0060338 | Regulation of type I interferon-mediated signaling pathway | 0.0083   | Cdc37, Hsp90ab1                                                                                                                                                   |
| 10     | GO:0032496 | Response to lipopolysaccharide                             | 0.0107   | Akt1, Sod2, Hspd1, Tspo, Hsf1                                                                                                                                     |
| 11     | GO:0010508 | Positive regulation of autophagy                           | 0.016    | Cdc37, Gsk3b, Hdac6                                                                                                                                               |
| 12     | GO:0002711 | Positive regulation of T cell mediated immunity            | 0.0237   | Hspa8, Hspd1                                                                                                                                                      |
| 13     | GO:0001817 | Regulation of cytokine production                          | 0.0339   | Hspb1, Sod1, Hsp90ab1, Hspd1, Tspo, Hsf1                                                                                                                          |
| 14     | GO:0071222 | Cellular response to lipopolysaccharide                    | 0.0376   | Akt1, Tspo, Hsf1                                                                                                                                                  |
| 15     | GO:0071356 | Cellular response to tumor necrosis factor                 | 0.0415   | Akt1, Bag4, Cfl1                                                                                                                                                  |

**TABLE S1 | See also TABLE 1 and FILES S1 and S2 |** Protein-protein interactions network of *Homo sapiens* MT3 with 50 first-shell and 50 second-shell interactors to determine functionally enriched GO BP categories using the STRING database.

FILE S1 |

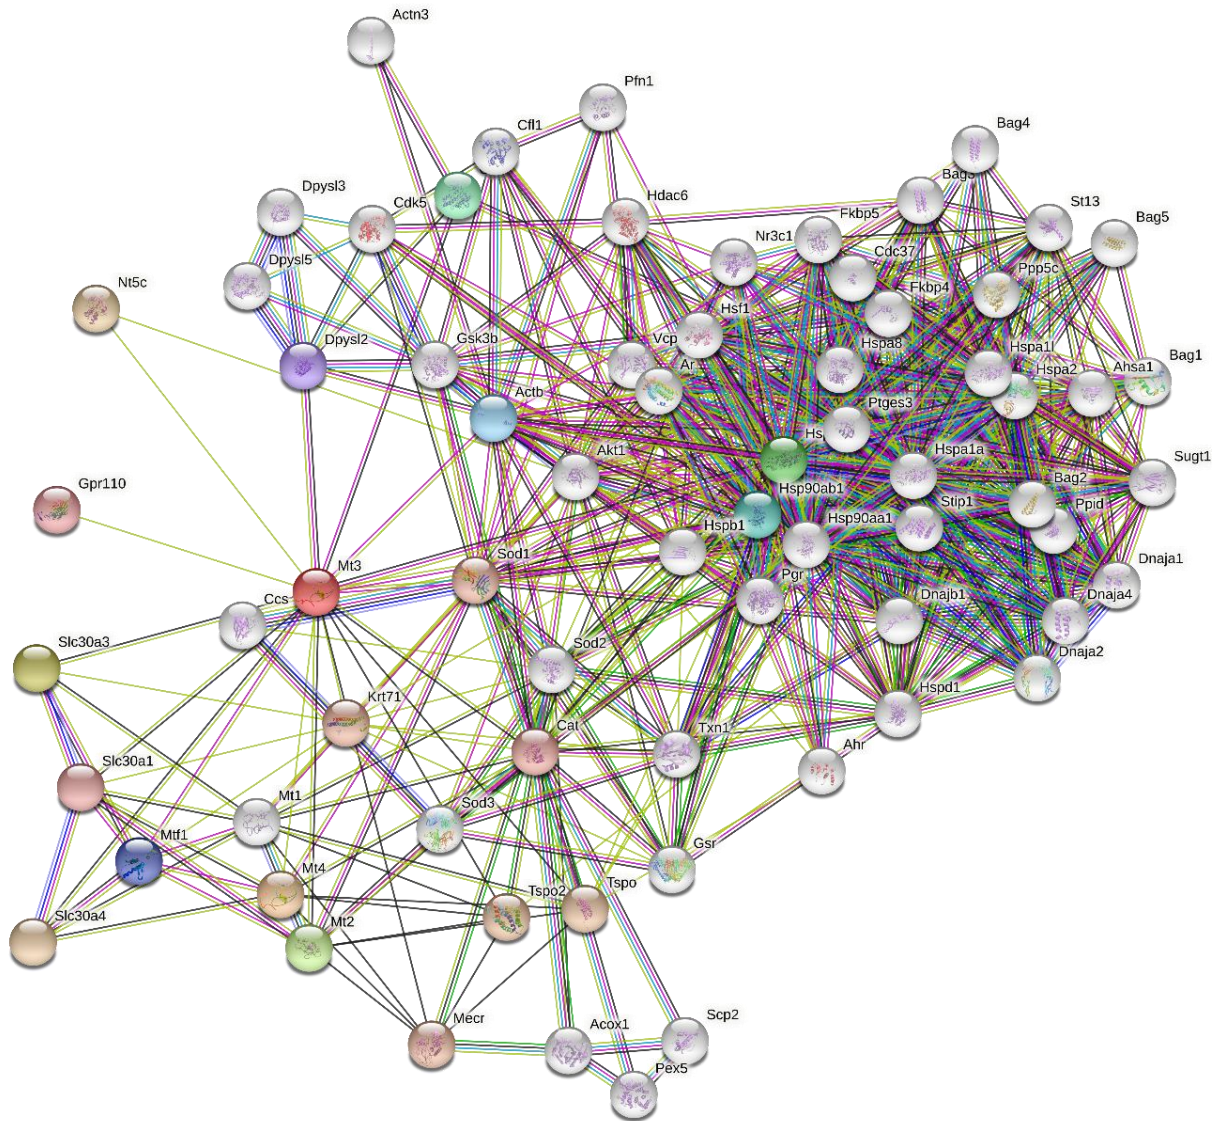

FILE S2 |

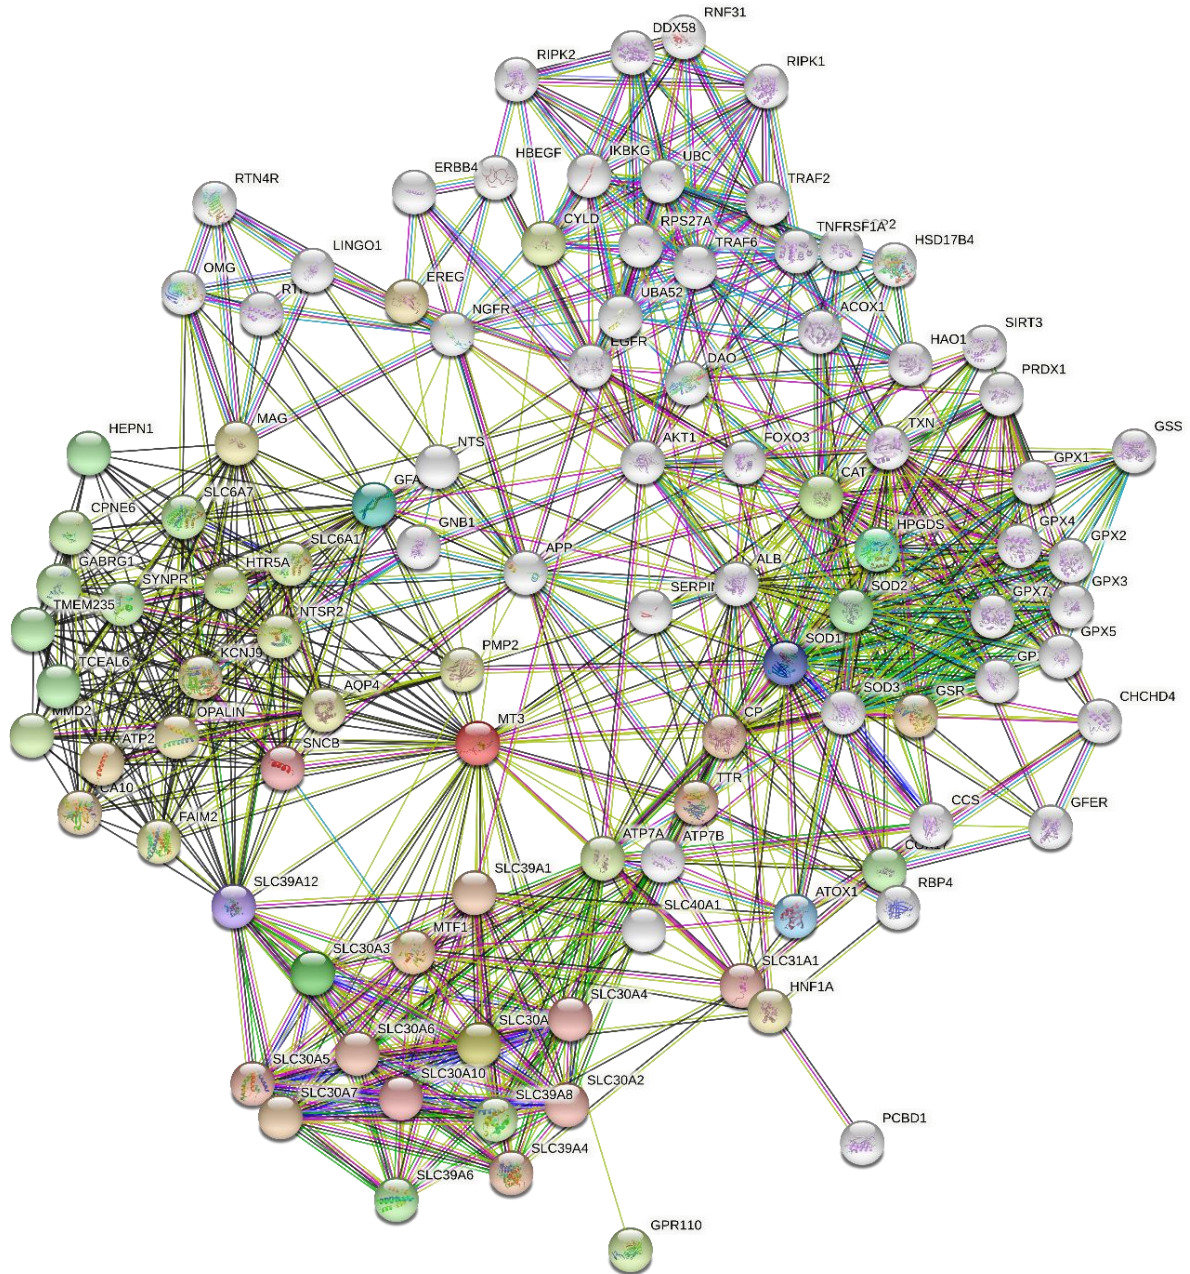

FILES S1 and S2. See also TABLE 1 and TABLE S1 | Protein-protein interaction network map of *Homo sapiens* and *Mus musculus* MT3. Protein-protein interaction

network map of MT3 in **(FILE S1)** *Homo sapiens* and **(FILE S2)** *Mus musculus* with 50 first-shell and 50 second-shell interactors showing functionally enriched gene ontology categories for biological processes (GO BP). See table 1 and table S1 for tabular representation of the GO BP categories identified using the STRING database for MT3 protein-protein network interactions in *Mus musculus* and *Homo sapiens*.

**FIGURE S1**

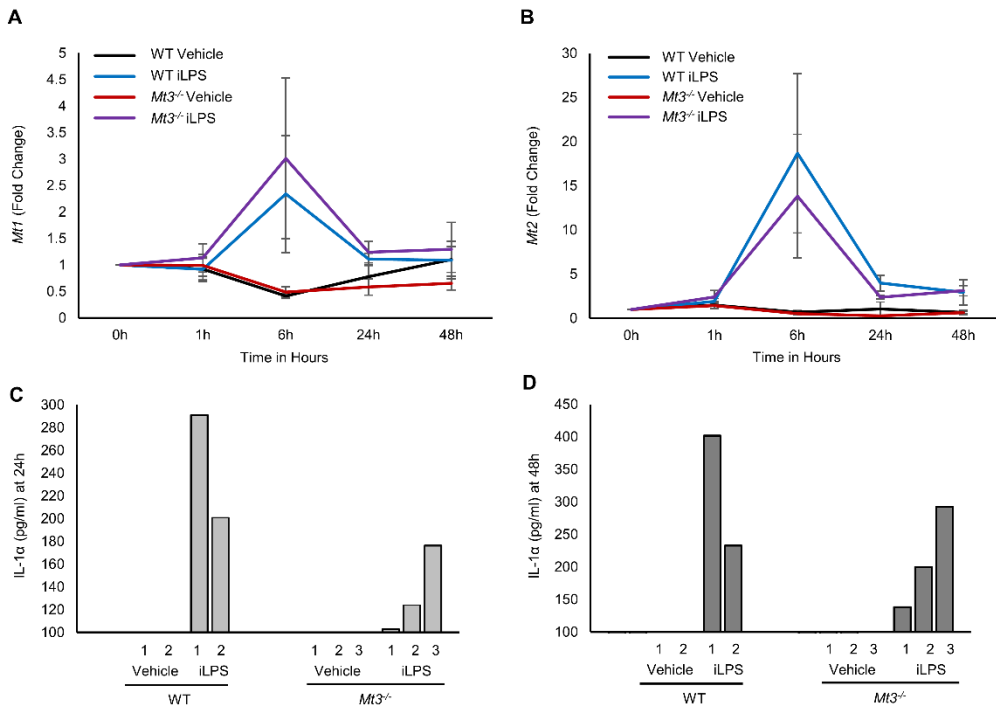

**FIGURE S1 | See also FIGURE 1 | Gene expression of *Mt1* and *Mt2* and IL-1 $\alpha$  levels in response to iLPS stimulation.** qRT-PCR analysis of **(A)** *Mt1* and **(B)** *Mt2* expression over time in WT and *Mt3*<sup>-/-</sup> BMDM $\phi$  stimulated with iLPS (2  $\mu$ g/ml) or vehicle control. Graphs represent data from 4 independent experiments, t-test (two-tailed p-value), data are mean  $\pm$  SEM. **(C, D)** IL-1 $\alpha$  measured by ELISA in supernatants of WT and *Mt3*<sup>-/-</sup> BMDM $\phi$  stimulated with 2  $\mu$ g/ml iLPS or vehicle for **(C)** 24h and **(D)** 48h, 2-3 independent experiments.

**FIGURE S2**

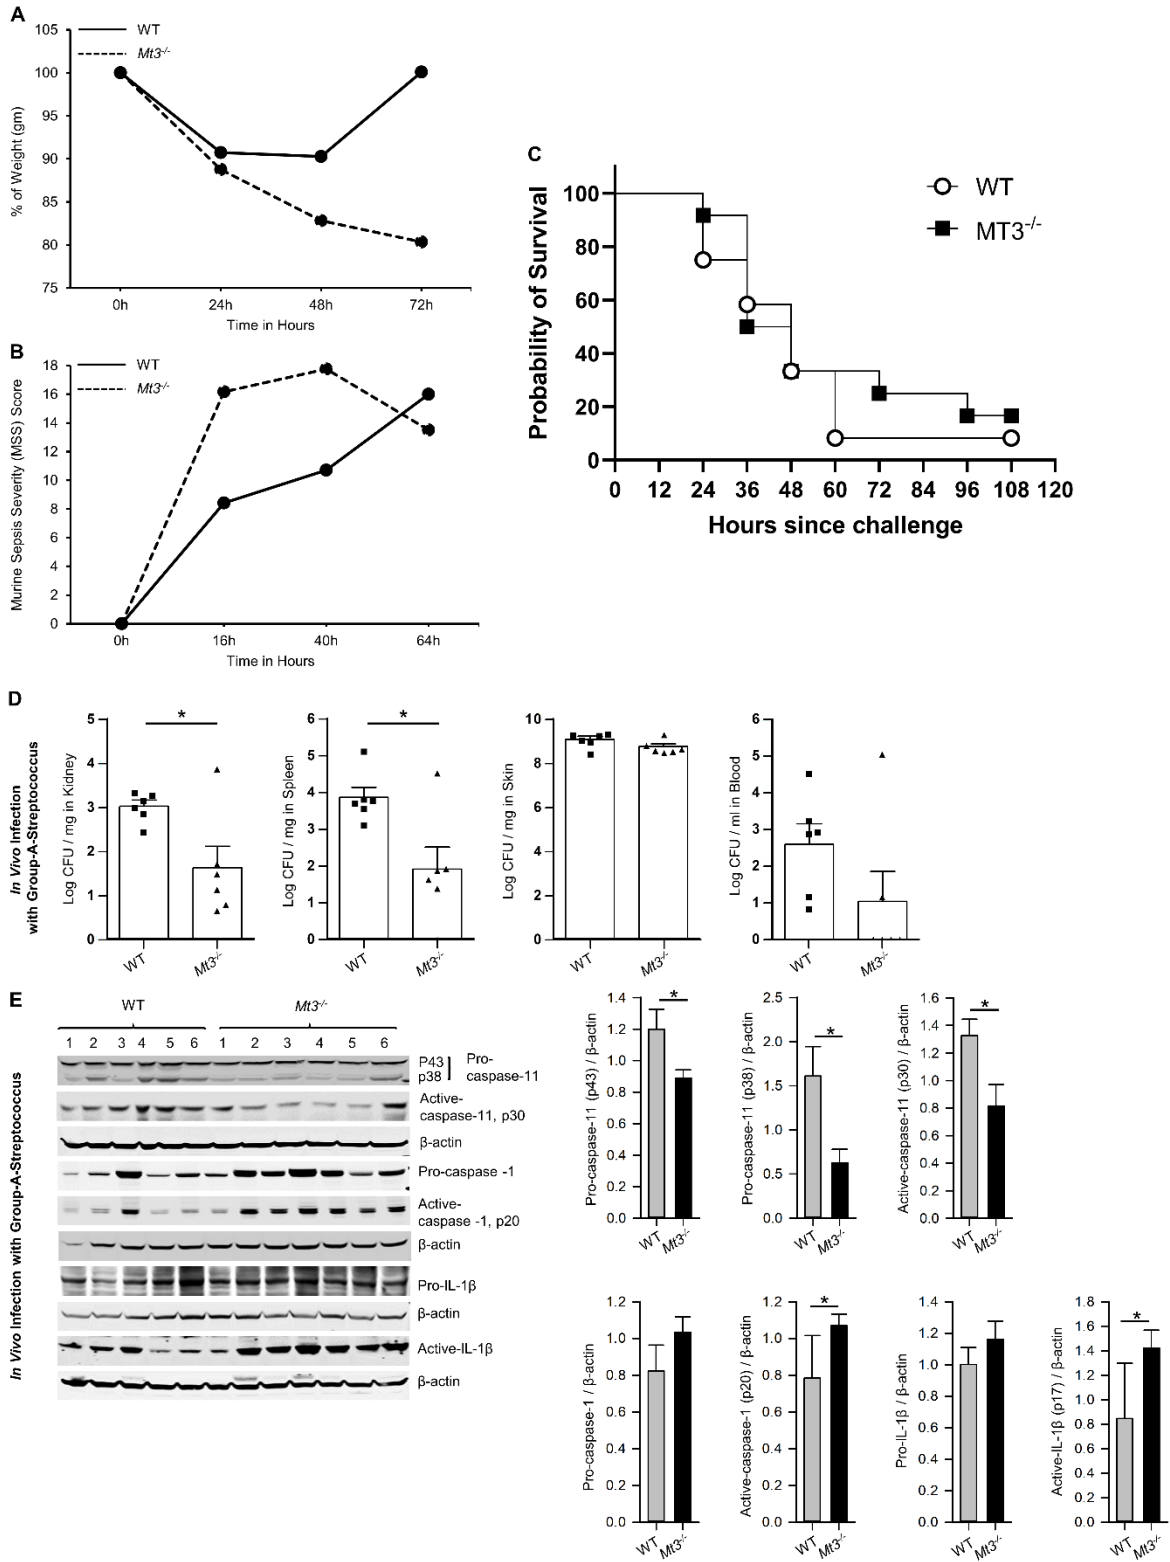

**FIGURE S2 | See also FIGURE 2 | Effect of MT3 on Group A Streptococcus elimination and LPS-induced septic shock.** Septic shock was induced in mice (n=12) *i.p.* with ultrapure LPS (20 mg/kg). **(A)** Weight in percentage, **(B)** MSS scoring of sepsis severity and **(C)** probability of survival was analyzed at the indicated time points. **(D)** WT and *Mt3*<sup>-/-</sup> mice infected *s.q.* with Group A Streptococcus (GAS5448) for 72h. Bacterial growth measured in kidney, spleen, skin and blood. CFUs were log transformed. n = 6 per group, two-tailed t-test. **(E)** Western blots of pro-caspase-11, active-caspase-11, pro-caspase-1, active-caspase-1, pro-IL1 $\beta$  and active-IL-1 $\beta$  in whole kidney homogenates. Bar graphs represent densitometric analysis of targets normalized to  $\beta$ -actin. n = 6 per group, two-tailed t-test, data are mean  $\pm$  SEM, \*p< 0.05.



**FIGURE S3**

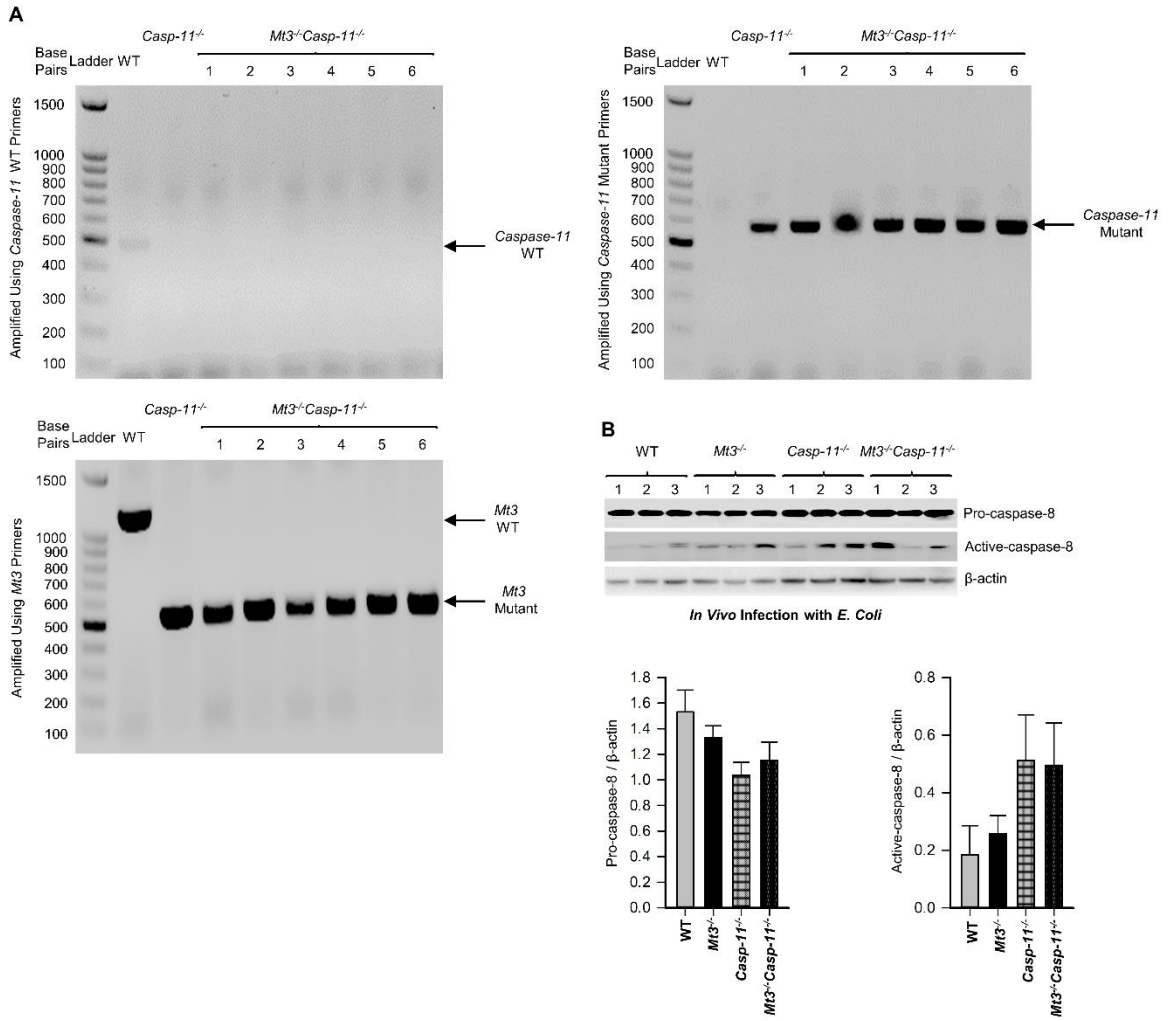

**FIGURE S3 | See also FIGURE 3 | Generation of *Casp11<sup>-/-</sup>Mt3<sup>-/-</sup>* mice and analysis of caspase-8 during *E. coli* infection *in vivo*. (A) *Mt3<sup>-/-</sup>* mice crossed to *Casp4<sup>tm1Yuan/J</sup>* (*Casp11<sup>-/-</sup>*) mice to obtain mice genetically deficient in *Mt3* and *Casp-11* (*Mt3<sup>-/-</sup>Casp11<sup>-/-</sup>*). Tail genomic DNA was amplified to confirm the deletion of *Casp-11* and *Mt3* genes by gel electrophoresis. (B) Western blots of pro-caspase-8 and active-caspase-8 in kidney homogenates of WT, *Casp-11<sup>-/-</sup>*, *Mt3<sup>-/-</sup>* and *Casp-11<sup>-/-</sup>Mt3<sup>-/-</sup>* mice infected *i.p.* with *E. coli* ( $1 \times 10^9$  CFUs/mouse) for 6h. Bar graphs represent densitometric analysis of targets normalized to  $\beta$ -actin, n = 3-6 per group, one-way ANOVA, data are mean  $\pm$  SEM.**

FIGURE S4

A

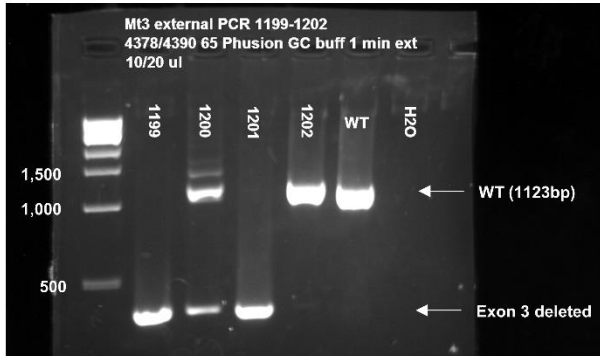

B

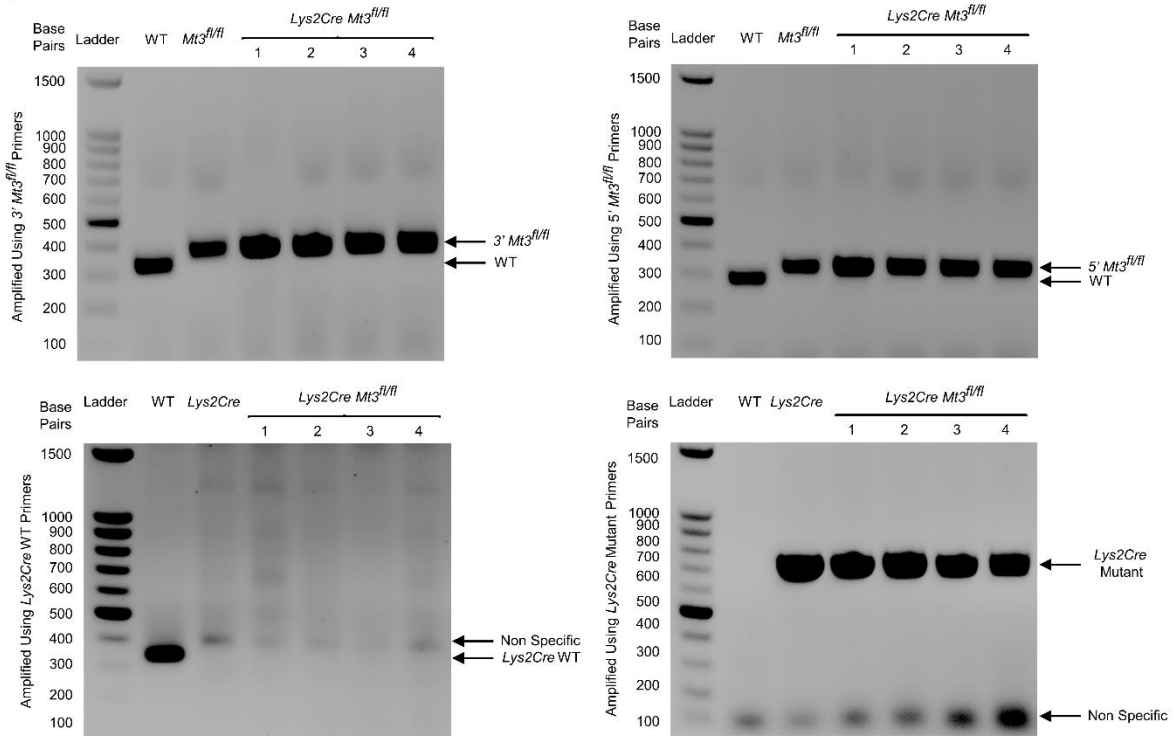

**FIGURE S4 | See also FIGURE 4 | Generation of myeloid-MT3 deficient mice.**

Genotyping of WT, *Mt3*<sup>-/-</sup>, *Lys2Cre*, *Mt3*<sup>fl/fl</sup> and *Lys2Cre Mt3*<sup>fl/fl</sup> mice. **(A)** Amplification of the *Mt3* targeted region showing homogenous *Mt3* deletion and generation of *Mt3*<sup>+/-</sup> heterozygous genotypes. **(B)** To confirm 5' loxp, 3' loxp and *Lys2Cre* insertion, tail genomic DNA was amplified and analyzed by gel electrophoresis using the primers detailed in the experimental procedures.

**FIGURE S5**

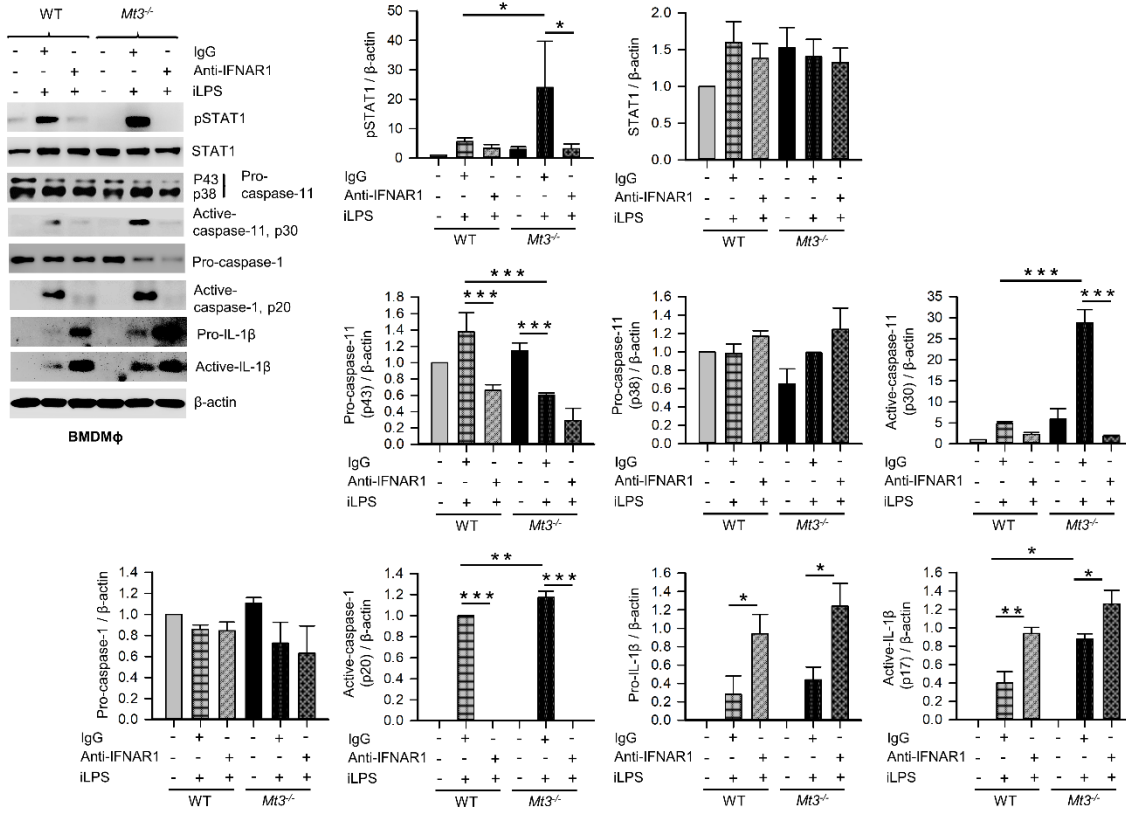

**FIGURE S5 | See also FIGURE 5 | IFNAR1 blockade attenuates caspase-11 and caspase-1 activation, but augments pro- and active-IL-1 $\beta$  levels in BMDM $\phi$ .** WT and *Mt3*<sup>-/-</sup> BMDM $\phi$  treated with monoclonal anti-IFNAR1 or IgG antibody 1h prior to and 24h after iLPS (10  $\mu$ g/ml, 48h) stimulation. Western blots of pSTAT1, STAT1, pro-caspase-11, active-caspase-11, procaspase-1 and pro-IL1 $\beta$  in cellular extracts and active caspase-1 and active-IL-1 $\beta$  in the cell-free media supernatants. Bar graphs represent densitometric analysis of targets normalized to  $\beta$ -actin. 3 independent experiments, one-way ANOVA, data are mean  $\pm$  SEM, \* $p$  < 0.05, \*\* $p$  < 0.01, \*\*\* $p$  < 0.001.

**FIGURE S6**

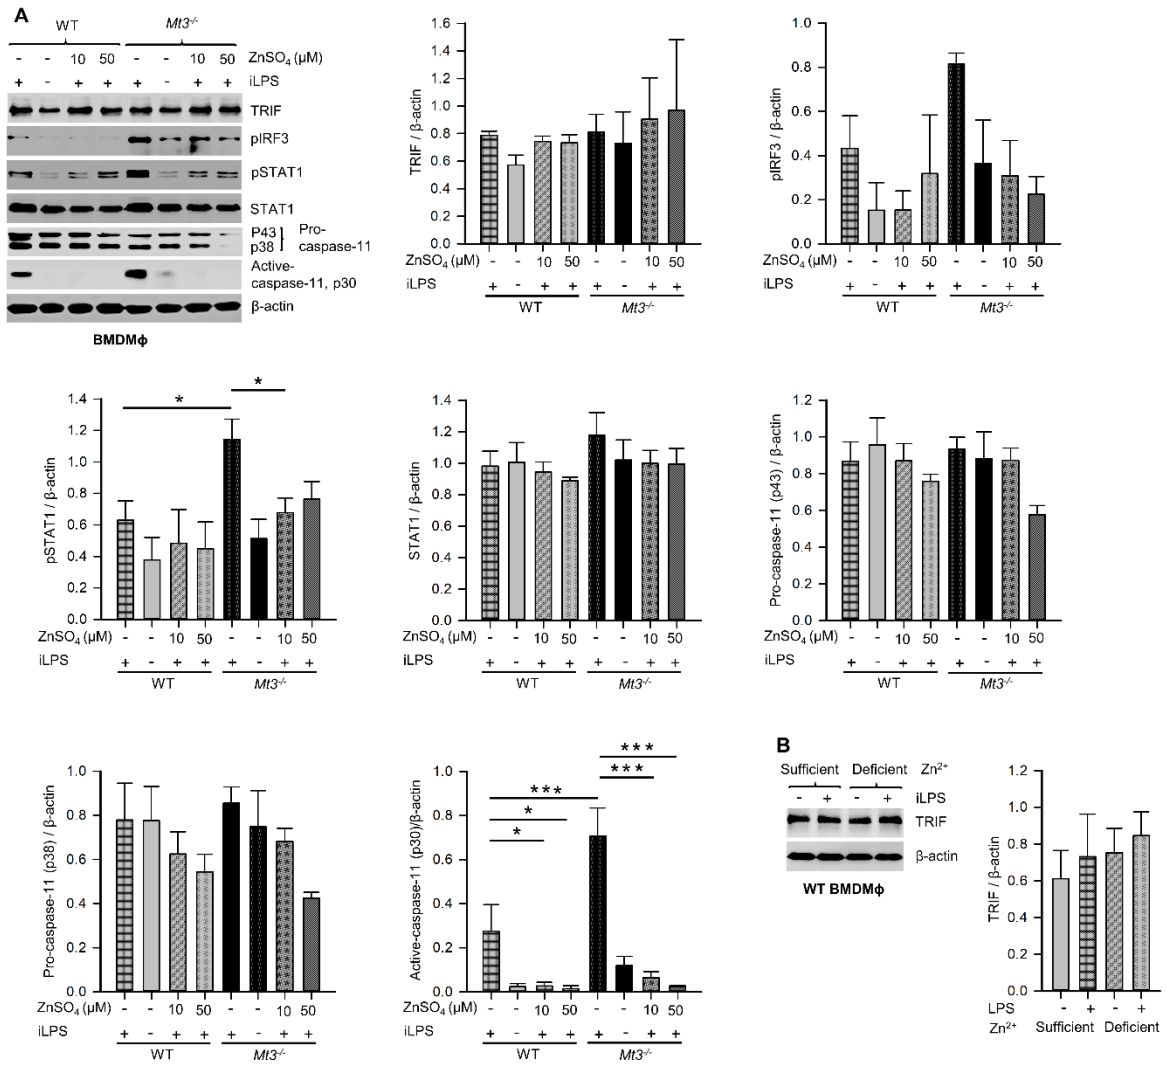

**FIGURE S6 | See also FIGURE 6 | Zn<sup>2+</sup> supplementation suppresses non-canonical inflammasome activation. (A)** WT and *Mt3<sup>-/-</sup>* BMDM $\phi$  exposed to the indicated doses of ZnSO<sub>4</sub> for 3h, followed by stimulation with iLPS (10  $\mu$ g/ml) or vehicle for 48h. Immunoblots of TRIF, pIRF3, pSTAT1, STAT1, pro-caspase-11 and active-caspase-11 in cellular extracts. Bar graphs represent densitometric analysis of targets normalized to  $\beta$ -actin. 3 independent experiments, one-way ANOVA. **(B)** WT BMDM $\phi$  stimulated with iLPS (10  $\mu$ g/ml) or vehicle for 24h in Zn<sup>2+</sup>-sufficient or Zn<sup>2+</sup>-deficient Opti-MEM media. Immunoblot of TRIF in cellular extracts. Bar graphs represent densitometric analysis of TRIF normalized to  $\beta$ -actin. 3 independent experiments, one-way ANOVA, data are mean  $\pm$  SEM, \*p < 0.05, \*\*\*p < 0.001.



## FIGURE S7

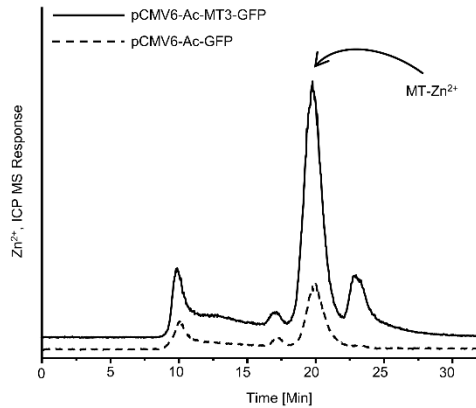

**FIGURE S7 | See also FIGURE 6 | Overexpression of MT3 in *Mt1*<sup>-/-</sup>*Mt2*<sup>-/-</sup> BMDM $\phi$ .** *Mt1*<sup>-/-</sup>*Mt2*<sup>-/-</sup> BMDM $\phi$  transfected with the *Mt3* overexpressing vector (pCMV6-Ac-MT3-GFP) or empty vector (pCMV6-Ac-GFP) control for 48 h. SEC-ICP-MS analysis of cell lysates demonstrating an increase in the MT-associated Zn<sup>2+</sup> signal in cells that were transfected with the pCMV6-Ac-MT3-GFP.
